# Supplementary material for: Pathological Studies on Hantaan Virus-Infected Mice Simulating Severe Hemorrhagic Fever with Renal Syndrome
Source: MDPI journal article supplement (doi:10.3390/v14102247), 2022-10-13
Supplement: s1 [file s1]

## Fig.2 For cell collection

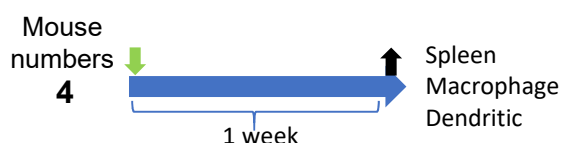

Fig.5B, KHF4,  
KHF5, 76-118

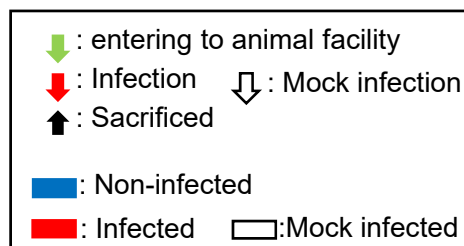

## Fig.3 For body weight measurement, Fig. 3A

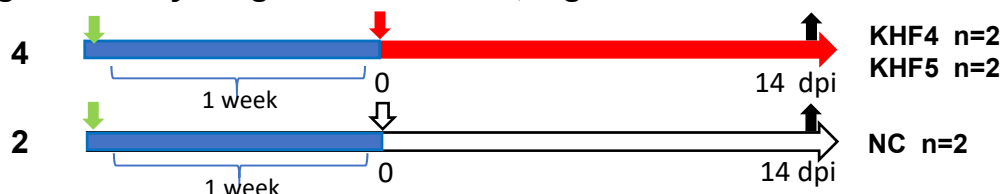

## Fig.4 & Fig.7 tissues (viral RNA, N protein ), blood and urine

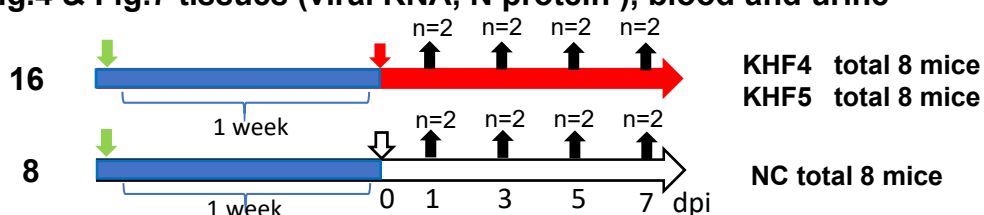

## Fig.5 Lung tissue infection

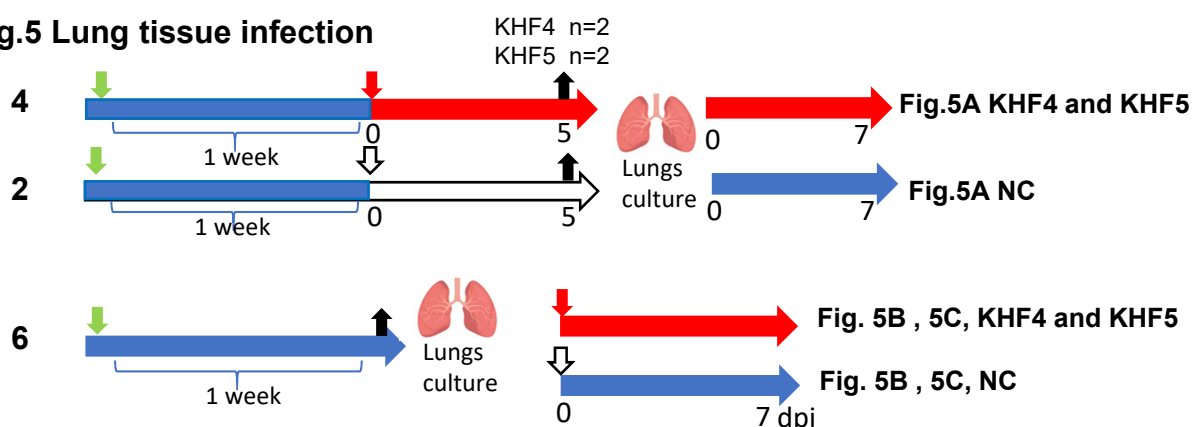

## Fig.6 For Immunohistochemistry and Fig. 3B

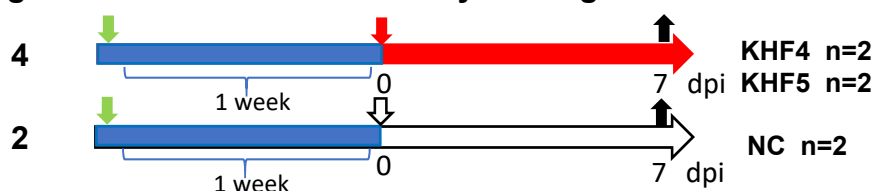

## Fig.8 For microarray

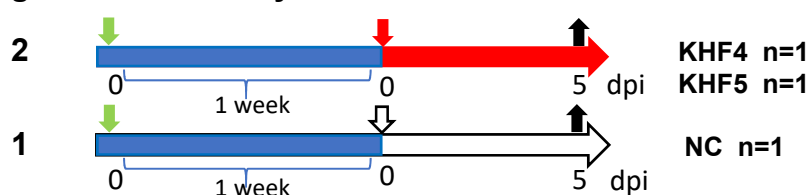

## Supplementary Figure S1 Outline of animal experimentation

A total of 55 female BALB/c mice, 4-weeks old were purchased and used in this research.

| Mouse ID | N protein /GAPDH |       |
|----------|------------------|-------|
|          | Lung             | Liver |
| KHF4 #1  | 0.13             | 1.12  |
| KHF4 #2  | 0.44             | 1.11  |
| KHF5 #1  | 1.95             | 1.73  |
| KHF5 #2  | 1.67             | 2.17  |
| NC #1    | 0.00             | 0.04  |
| NC #2    | 0.02             | 0.05  |

**Supplementary Table S1 Comparison of N protein production in lung and liver**

Western blot images of lung and liver shown in Fig. 4B were quantified by Fiji/ImageJ software. Ratio of N protein to GAPDH was estimated in liver and lung tissues.

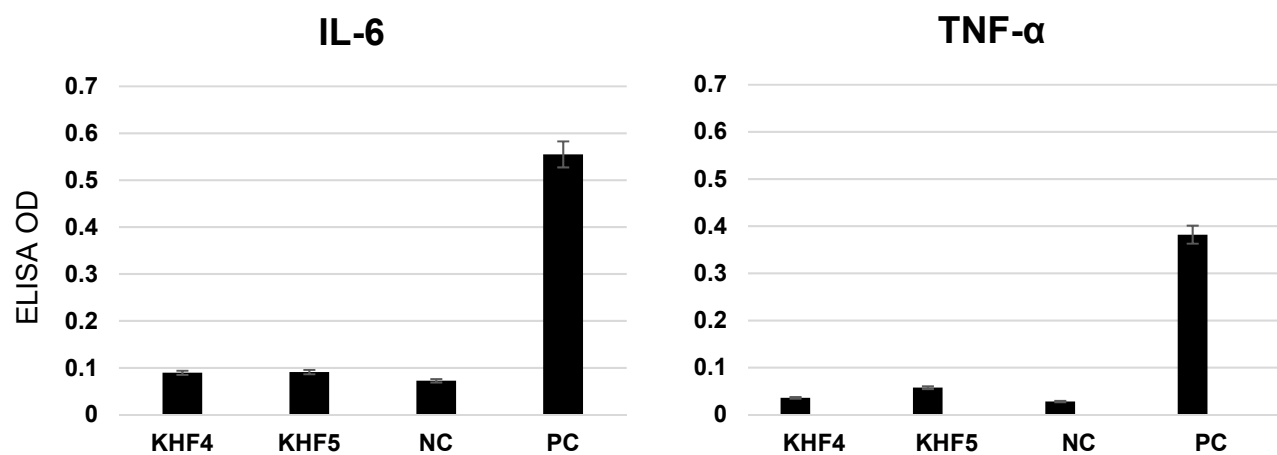

**Supplementary Figure S2 Detection of IL-6 and TNF-alpha in sera**

Sera were obtained from KHF4, KHF5, and mock infected mice (n=2). Sera were examined at 1:3 dilutions. Positive control IL-6 (333.3 pg/ml) and of TNF-alpha (187.5 pg /mL) were used. All test were performed in duplicate.

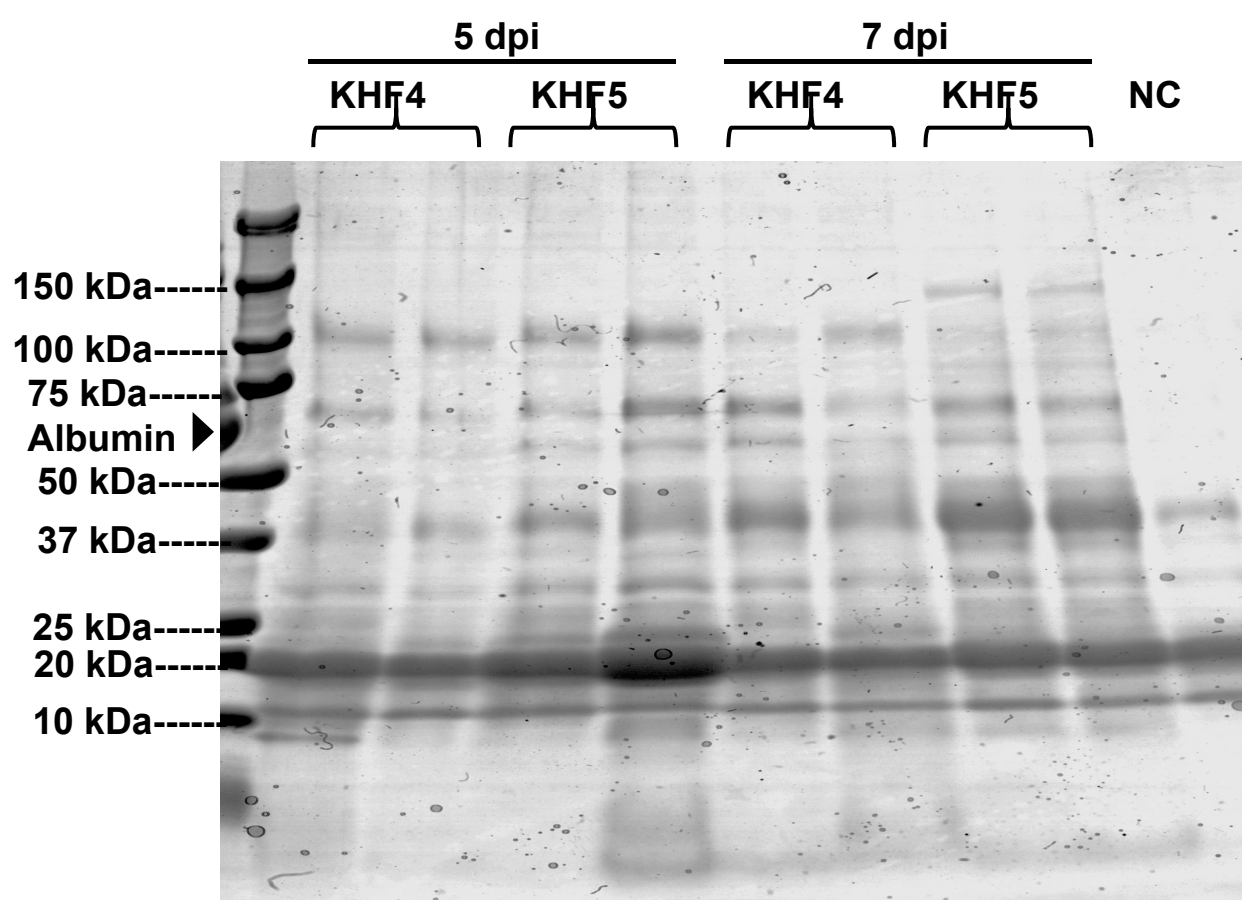

**Supplementary Figure S3 Urinary protein analysis by SDS-PAGE**

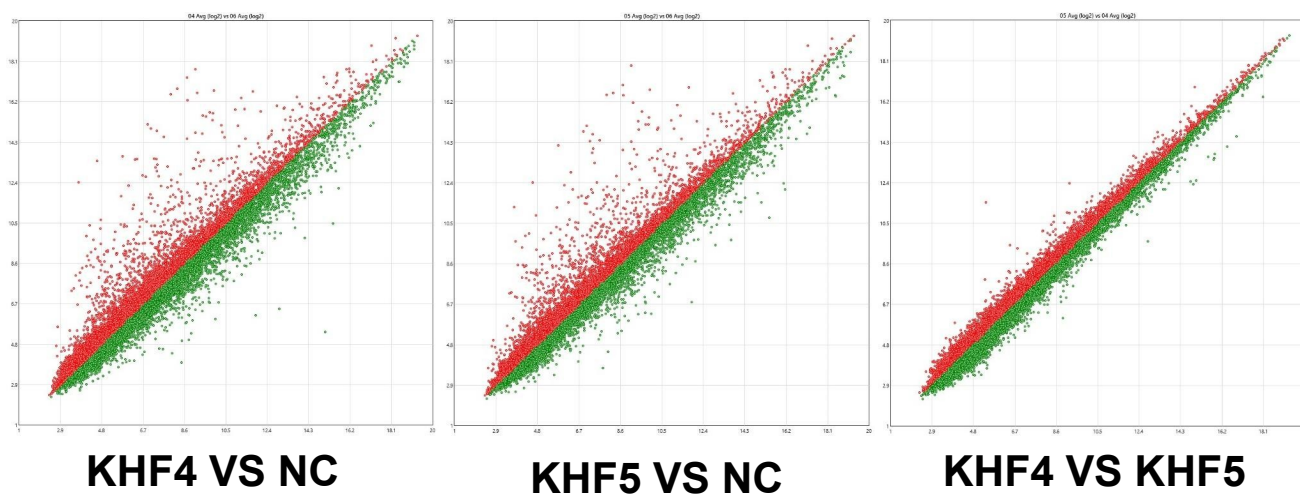

**Supplementary Figure S4 Liver gene expression profiling by microarray**
